# Supplementary material for: Photothermal CO-PROX reaction over ternary CuCoMnOx spinel oxide catalysts: the effect of the copper dopant and thermal treatment
Source: Royal Society of Chemistry journal article supplement (doi:10.1039/d2cp05992d), 2023-01-01
Supplement: d2cp05992d1.pdf [file d2cp05992d1.pdf]

**Table S1. Lattice parameter and cell volume of CoMnO<sub>x</sub>-T and CuCoMnO<sub>x</sub>-T catalyst**

| Catalyst                  | Space group | Lattice Parameter (Å) |       |       | Cell volume (Å <sup>3</sup> ) |
|---------------------------|-------------|-----------------------|-------|-------|-------------------------------|
|                           |             | a                     | b     | c     |                               |
| CoMnO <sub>x</sub> -200   | I41/amd     | 8.097                 | 8.097 | 9.266 | 607.5                         |
| CoMnO <sub>x</sub> -300   | I41/amd     | 8.096                 | 8.096 | 9.242 | 605.7                         |
| CoMnO <sub>x</sub> -400   | I41/amd     | 8.096                 | 8.096 | 9.243 | 605.9                         |
| CoMnO <sub>x</sub> -500   | I41/amd     | 8.097                 | 8.097 | 9.254 | 606.7                         |
| CuCoMnO <sub>x</sub> -200 | Fd-3m       | 8.169                 | --    | --    | 545.2                         |
| CuCoMnO <sub>x</sub> -300 | Fd-3m       | 8.160                 | --    | --    | 543.5                         |
| CuCoMnO <sub>x</sub> -400 | Fd-3m       | 8.176                 | --    | --    | 546.7                         |
| CuCoMnO <sub>x</sub> -500 | Fd-3m       | 8.189                 | --    | --    | 549.3                         |

**Table S2.** Grain size of CoMnO<sub>x</sub>-T and CuCoMnO<sub>x</sub>-T calculated by XRD

| <b>Catalyst</b>                | <b><math>\theta</math></b> | <b>hkl</b> | <b>FWHM</b>  | <b>D/Å</b> |
|--------------------------------|----------------------------|------------|--------------|------------|
| <b>CoMnO<sub>x</sub>-200</b>   | <b>36.23</b>               | <b>311</b> | <b>0.934</b> | <b>89</b>  |
| <b>CuCoMnO<sub>x</sub>-200</b> | <b>36.47</b>               | <b>311</b> | <b>0.957</b> | <b>86</b>  |
| <b>CoMnO<sub>x</sub>-300</b>   | <b>36.43</b>               | <b>311</b> | <b>1.035</b> | <b>80</b>  |
| <b>CuCoMnO<sub>x</sub>-300</b> | <b>36.39</b>               | <b>311</b> | <b>1.111</b> | <b>74</b>  |
| <b>CoMnO<sub>x</sub>-400</b>   | <b>36.36</b>               | <b>311</b> | <b>0.952</b> | <b>87</b>  |
| <b>CuCoMnO<sub>x</sub>-400</b> | <b>36.34</b>               | <b>311</b> | <b>0.959</b> | <b>86</b>  |
| <b>CoMnO<sub>x</sub>-500</b>   | <b>36.39</b>               | <b>311</b> | <b>0.411</b> | <b>201</b> |
| <b>CuCoMnO<sub>x</sub>-500</b> | <b>36.34</b>               | <b>311</b> | <b>0.464</b> | <b>178</b> |

**Table S3.** Specific surface area and pore volume of CoMnO<sub>x</sub>-T and CuCoMnO<sub>x</sub>-T catalysts

| <b>Catalyst</b>                | <b>S<sub>BET</sub> (m<sup>2</sup>g<sup>-1</sup>)</b> | <b>V<sub>Pore</sub> (cm<sup>3</sup>g<sup>-1</sup>)</b> |
|--------------------------------|------------------------------------------------------|--------------------------------------------------------|
| <b>CoMnO<sub>x</sub>-200</b>   | <b>75</b>                                            | <b>0.246</b>                                           |
| <b>CoMnO<sub>x</sub>-300</b>   | <b>109</b>                                           | <b>0.267</b>                                           |
| <b>CoMnO<sub>x</sub>-400</b>   | <b>63</b>                                            | <b>0.186</b>                                           |
| <b>CoMnO<sub>x</sub>-500</b>   | <b>30</b>                                            | <b>0.210</b>                                           |
| <b>CuCoMnO<sub>x</sub>-200</b> | <b>49</b>                                            | <b>0.109</b>                                           |
| <b>CuCoMnO<sub>x</sub>-300</b> | <b>79</b>                                            | <b>0.157</b>                                           |
| <b>CuCoMnO<sub>x</sub>-400</b> | <b>53</b>                                            | <b>0.157</b>                                           |
| <b>CuCoMnO<sub>x</sub>-500</b> | <b>12</b>                                            | <b>0.090</b>                                           |

**Table S4.** The H<sub>2</sub> consumption of CoMnO<sub>x</sub>-T and CuCoMnO<sub>x</sub>-T catalyst calculated by H<sub>2</sub>-TPR

| <b>Catalyst</b>                | <b>Total H<sub>2</sub> cons.<br/>(mmol/g<sub>cat</sub>)</b> |
|--------------------------------|-------------------------------------------------------------|
| <b>CoMnO<sub>x</sub>-200</b>   | <b>7.83</b>                                                 |
| <b>CoMnO<sub>x</sub>-300</b>   | <b>11.05</b>                                                |
| <b>CoMnO<sub>x</sub>-400</b>   | <b>11.26</b>                                                |
| <b>CoMnO<sub>x</sub>-500</b>   | <b>8.94</b>                                                 |
| <b>CuCoMnO<sub>x</sub>-200</b> | <b>11.03</b>                                                |
| <b>CuCoMnO<sub>x</sub>-300</b> | <b>11.64</b>                                                |
| <b>CuCoMnO<sub>x</sub>-400</b> | <b>11.42</b>                                                |
| <b>CuCoMnO<sub>x</sub>-500</b> | <b>10.94</b>                                                |

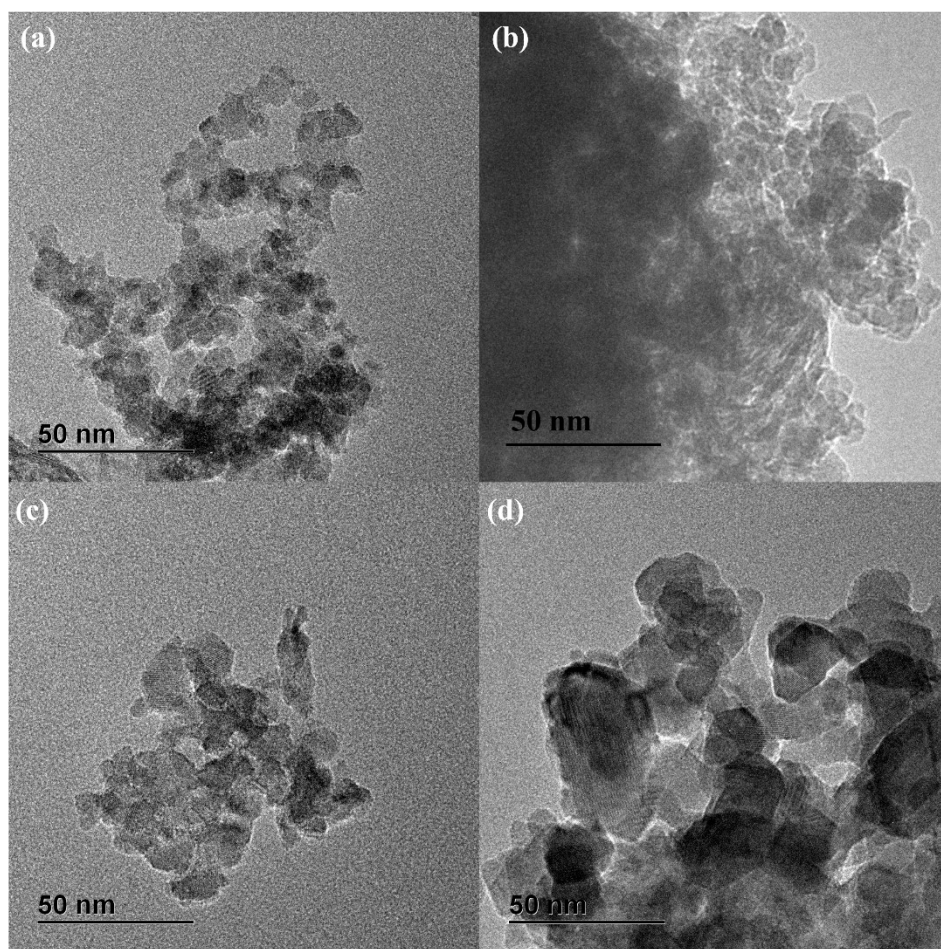

**Figure S1** TEM images of  $\text{CuCoMnO}_x$ -200 (a),  $\text{CuCoMnO}_x$ -300 (b),  $\text{CuCoMnO}_x$ -400 (c) and  $\text{CuCoMnO}_x$ -500 (d)

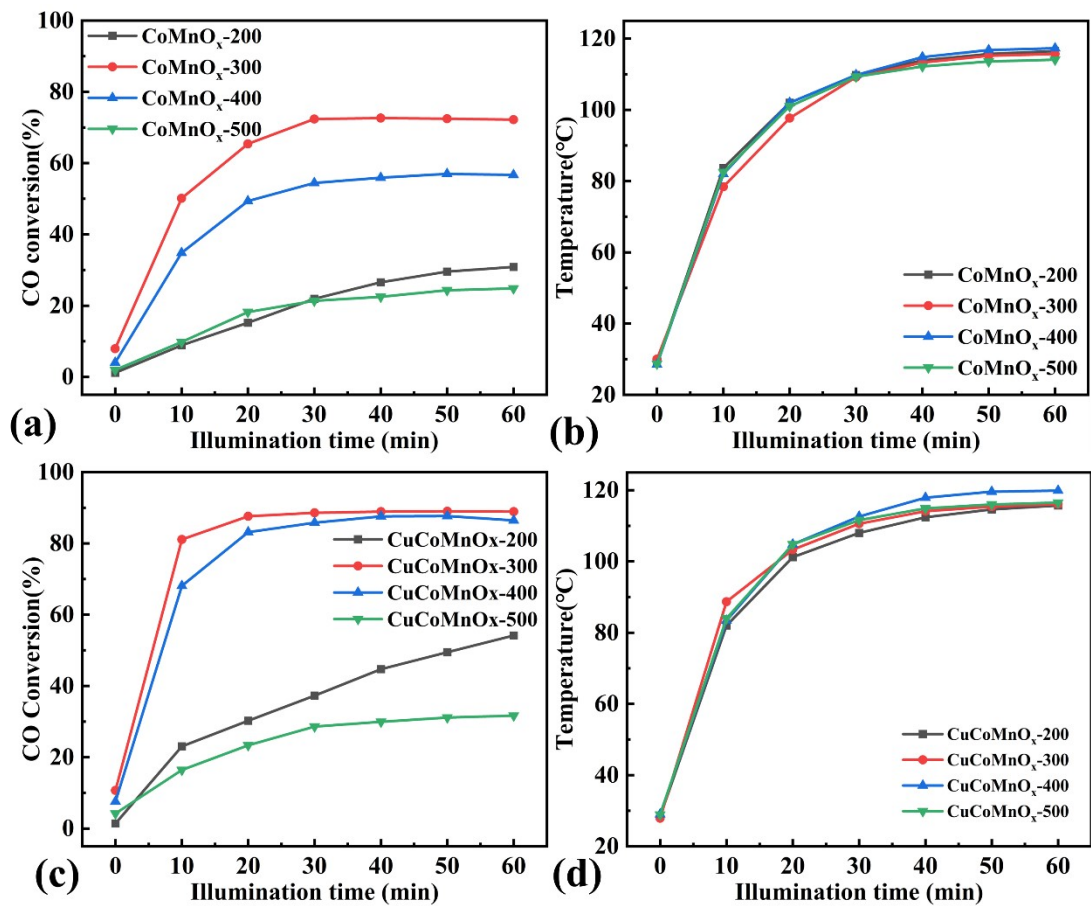

**Figure S2.** CO conversion (a,c) and temperature (b,d) curves of CoMnO<sub>x</sub>-T and CuCoMnO<sub>x</sub>-T in CO-PROX at 250 mW/cm<sup>2</sup>

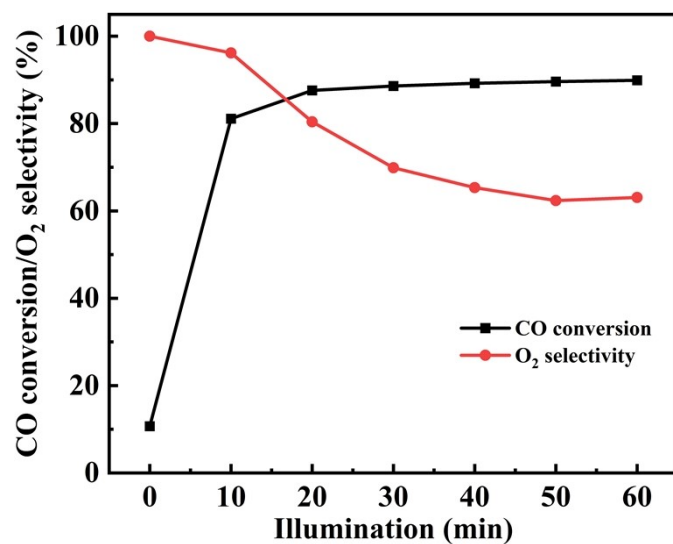

Figure S3 CO conversion and O<sub>2</sub> selectivity of CuCoMnO<sub>x</sub>-300 for photothermal CO-PROX

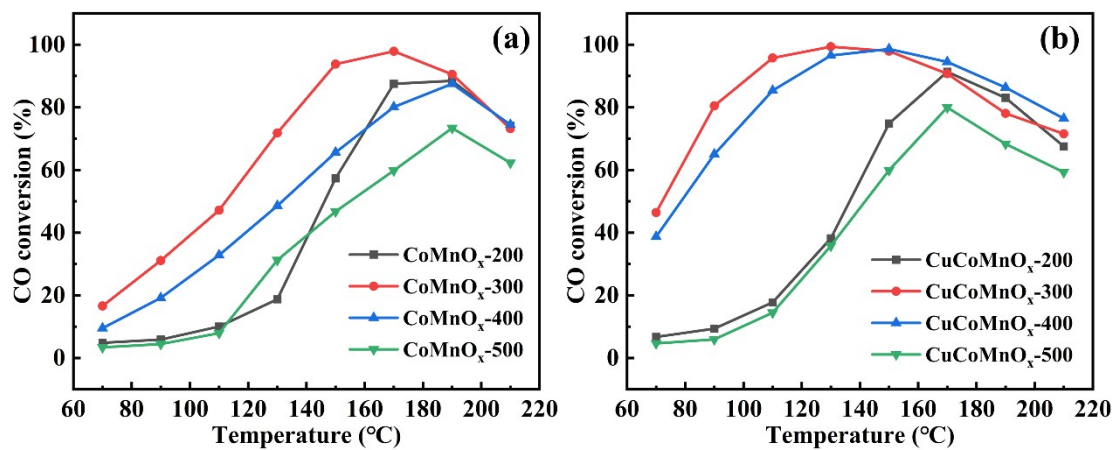

Figure S4. CO conversion of thermal catalysis over CoMnO<sub>x</sub>-T (a) and CuCoMnO<sub>x</sub>-T (b)



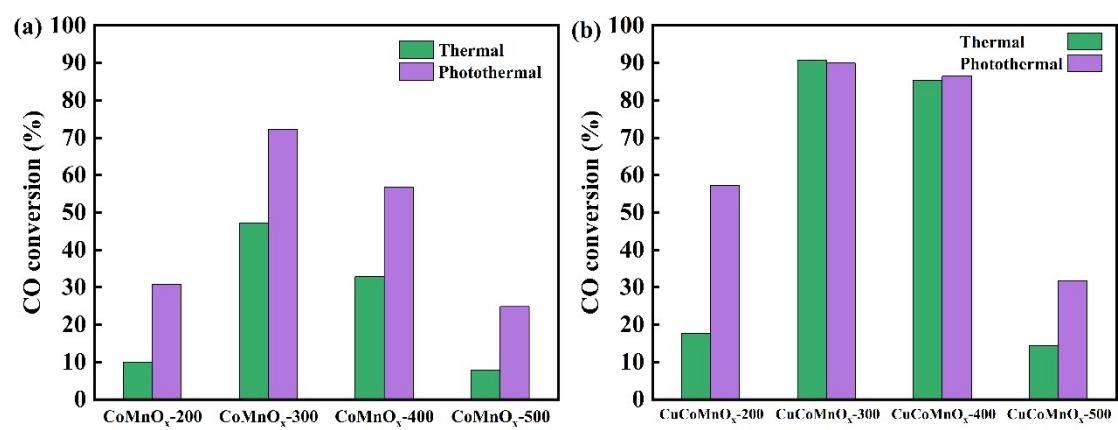

**Figure S5.** comparison of CO conversion of the CoMnO<sub>x</sub> and CuCoMnO<sub>x</sub> catalysts for thermal and photothermal CO-PROX

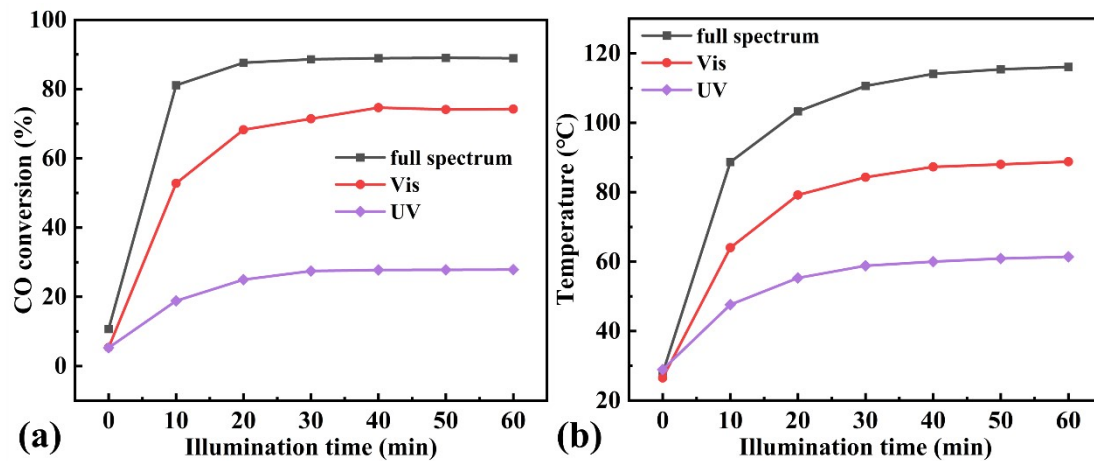

Figure S6. CO conversion and temperature curve of CuCoMnO<sub>x</sub>-300 in CO-PROX at 250W/cm<sup>2</sup> illuminated under different optical composition

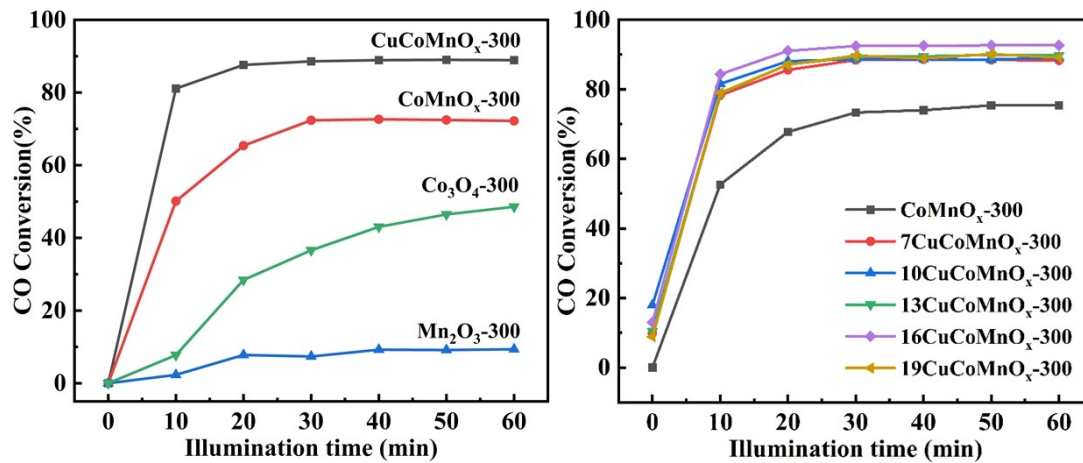

**Figure S7.** CO conversions of pure  $\text{Co}_3\text{O}_4$  and  $\text{Mn}_2\text{O}_3$ , binary  $\text{CoMnO}_x$  and ternary  $\text{CuCoMnO}_x$  calcined at 300 °C (a) and CO conversions of  $\text{CuCoMnO}_x$ -300 with different copper amount in photothermal CO-PROX at 250mW/cm<sup>2</sup>

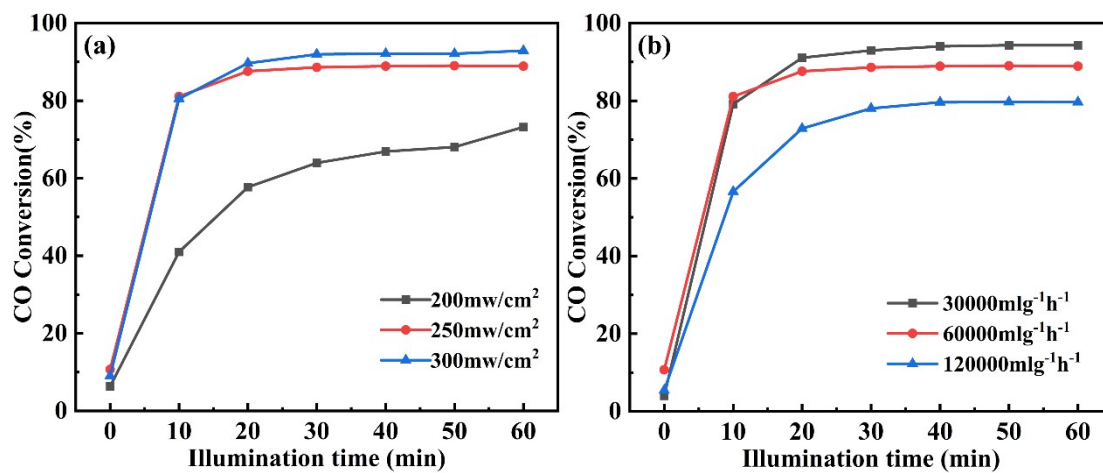

**Figure S8.** CO conversion of CuCoMnO<sub>x</sub>-300 in CO-PROX at different illumination power densities (a) and at different weight hourly space velocity (b) at 250 mW/cm<sup>2</sup> (b)

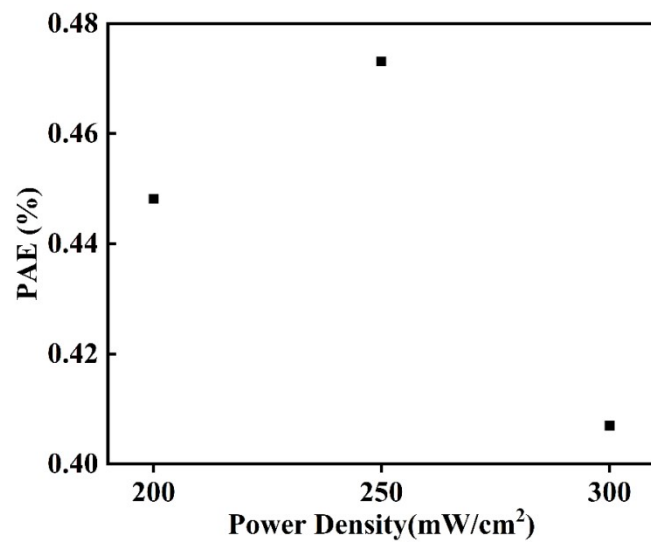

**Figure S9.** PAE values of CuCoMnO<sub>x</sub>-300 catalyst under different illumination densities.

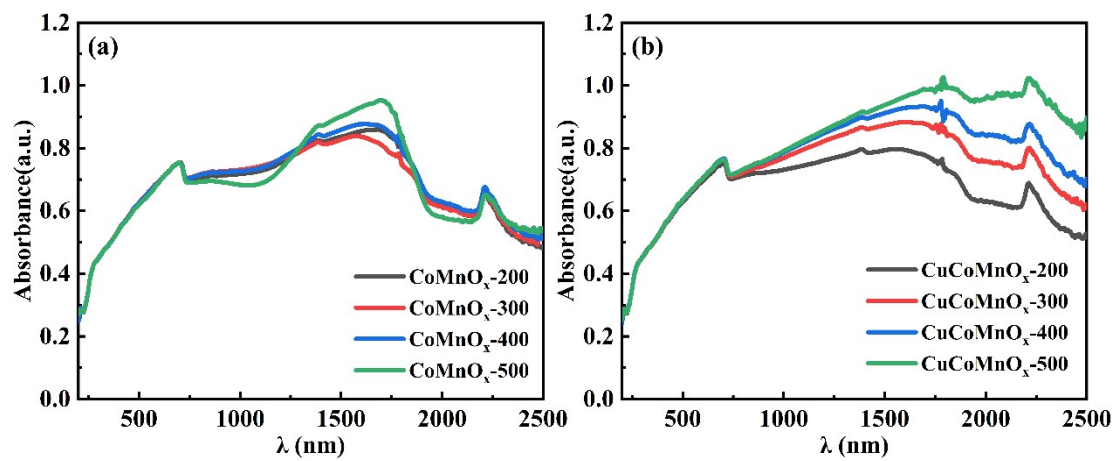

**Figure S10.** UV-Vis-IR absorption spectra of (a) CoMnO<sub>x</sub>-T, (b) CuCoMnO<sub>x</sub>-T.

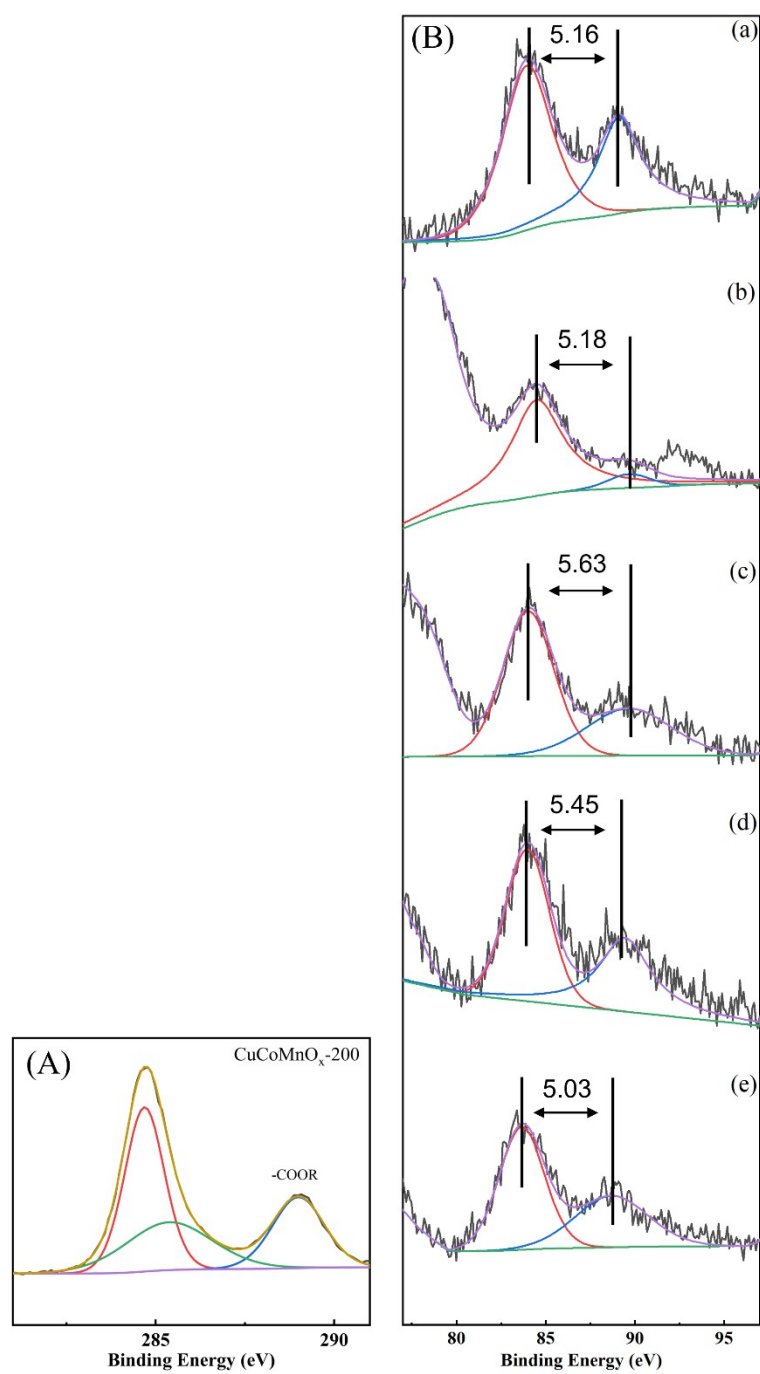

**Figure S11.** XPS spectra of C 1s (A) and Mn 3s (B) of CoMnO<sub>x</sub>-300 (a), CuCoMnO<sub>x</sub>-200 (b), CuCoMnO<sub>x</sub>-300 (c), CuCoMnO<sub>x</sub>-400 (d) and CuCoMnO<sub>x</sub>-500 (e).

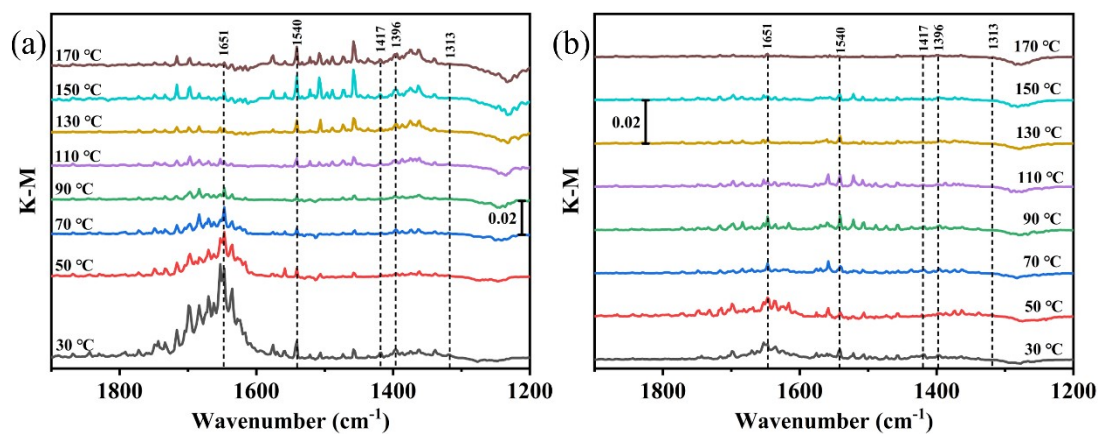

**Figure S12.** DRIFTS spectra (1900-1200 cm<sup>-1</sup>) of CoMnO<sub>x</sub>-300 (a) and CuCoMnO<sub>x</sub>-300 (b) under the reaction stream at different temperature.



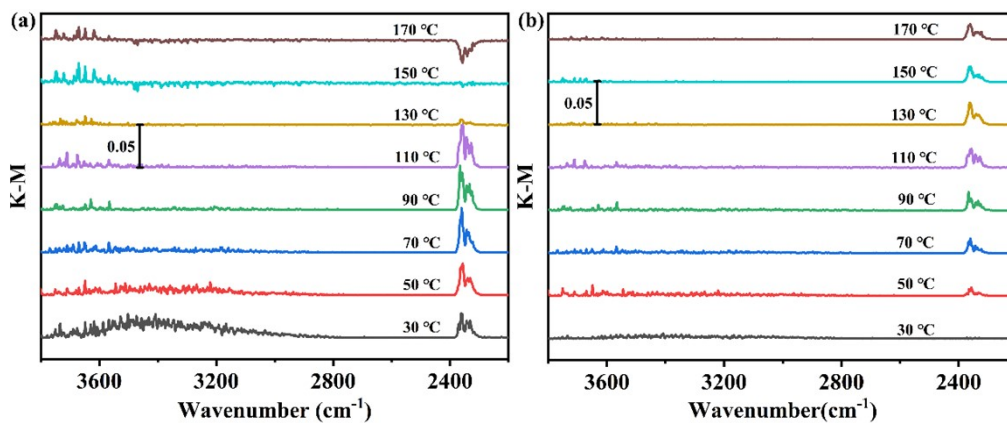

**Figure S13.** DRIFTS spectra (3800-2200  $\text{cm}^{-1}$ ) of CoMnO<sub>x</sub>-300 (a) and CuCoMnO<sub>x</sub>-300 (b).
