# Supplementary material for: Photothermal CO-PROX reaction over ternary CuCoMnOx spinel oxide catalysts: the effect of the copper dopant and thermal treatment
Source: Royal Society of Chemistry journal article supplement (doi:10.1039/d2cp05992d), 2023-01-01
Supplement: d2cp05992d2.pdf [file d2cp05992d2.pdf]

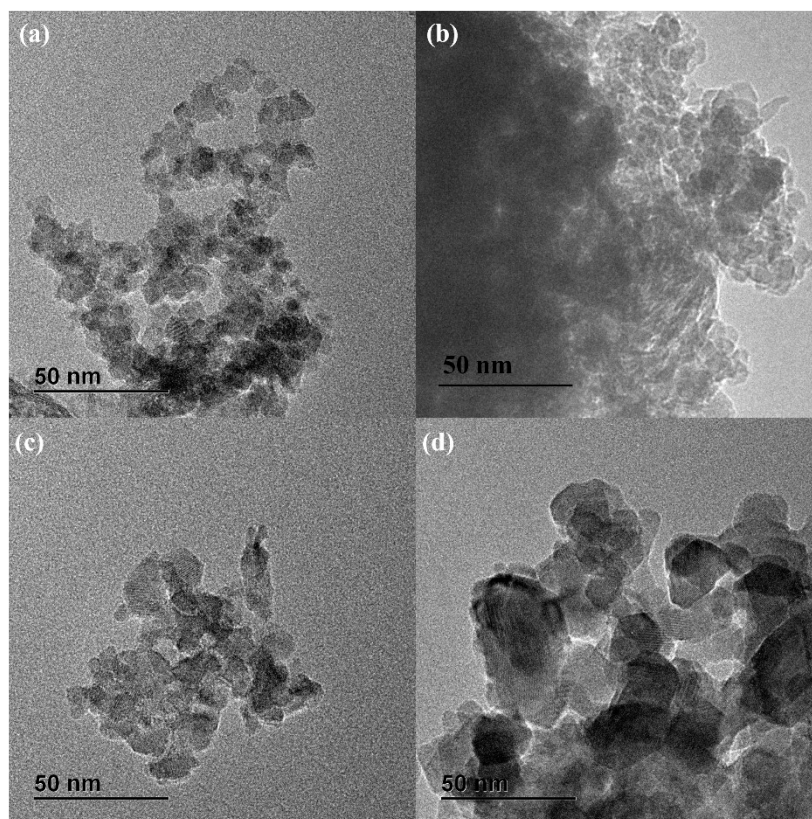

Figure S1. TEM images of CuCoMnO<sub>x</sub>-200 (a), CuCoMnO<sub>x</sub>-300 (b), CuCoMnO<sub>x</sub>-400 (c) and CuCoMnO<sub>x</sub>-500 (d).

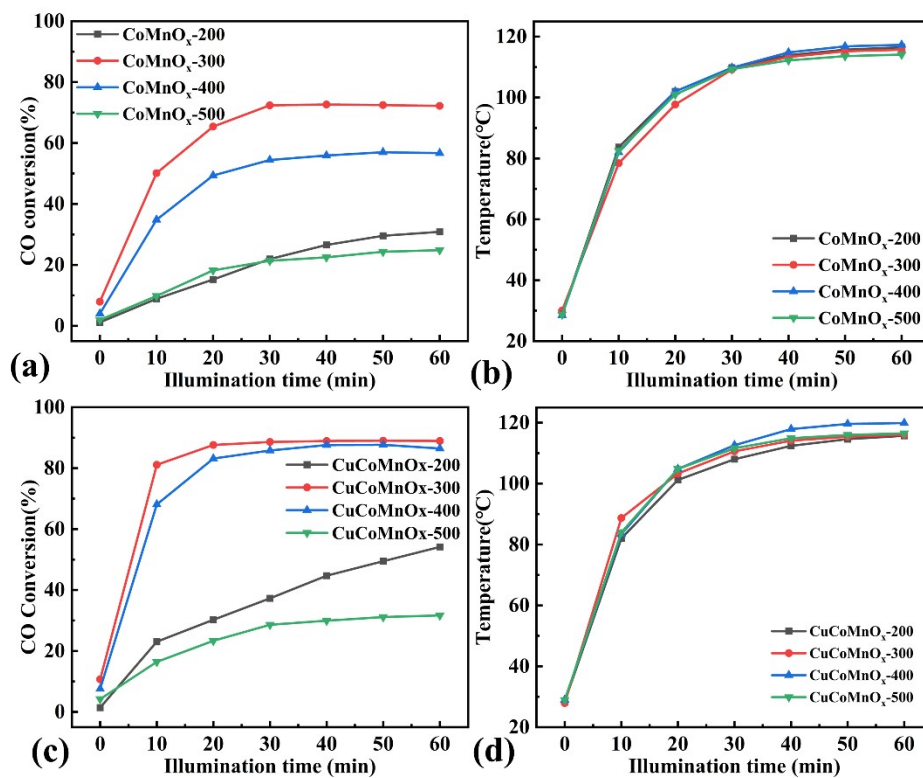

Figure S2. CO conversion (a,c) and temperature (b,d) curves of CoMnO<sub>x</sub>-T and CuCoMnO<sub>x</sub>-T in CO-PROX at 250 mW/cm<sup>2</sup>.

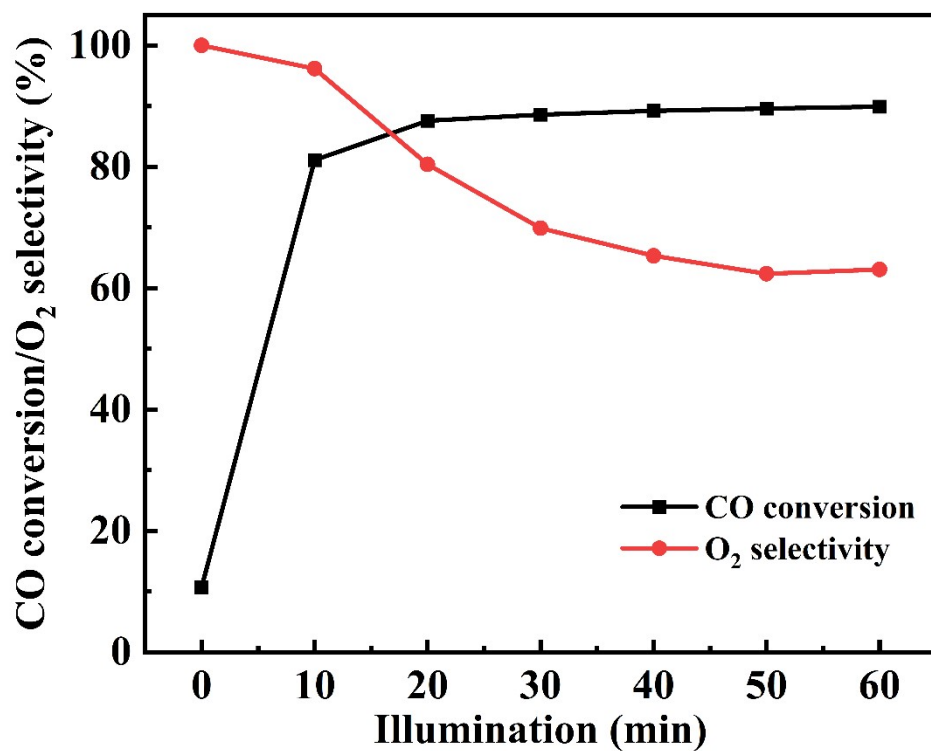

Figure S3. CO conversion and O<sub>2</sub> selectivity of CuCoMnO<sub>x</sub>-300 for photothermal CO-PROX.

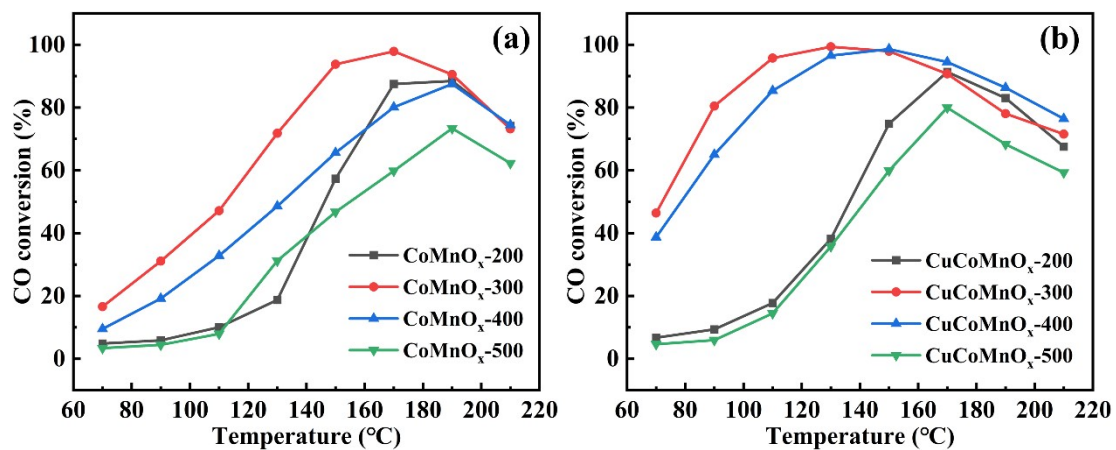

Figure S4. CO conversion of thermal catalysis over CoMnO<sub>x</sub>-T (a) and CuCoMnO<sub>x</sub>-T (b).

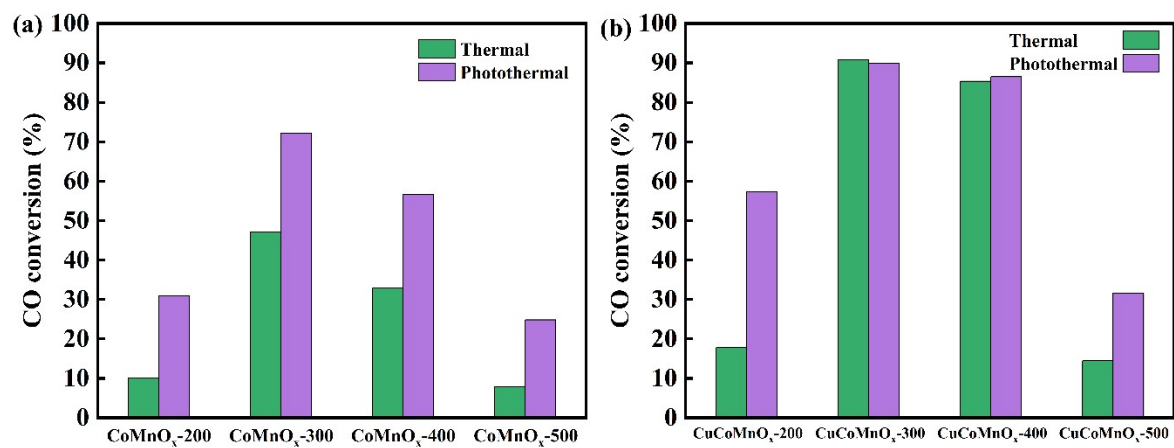

Figure S5. comparison of CO conversion of the CoMnO<sub>x</sub> and CuCoMnO<sub>x</sub> catalysts for thermal and photothermal CO-PROX.

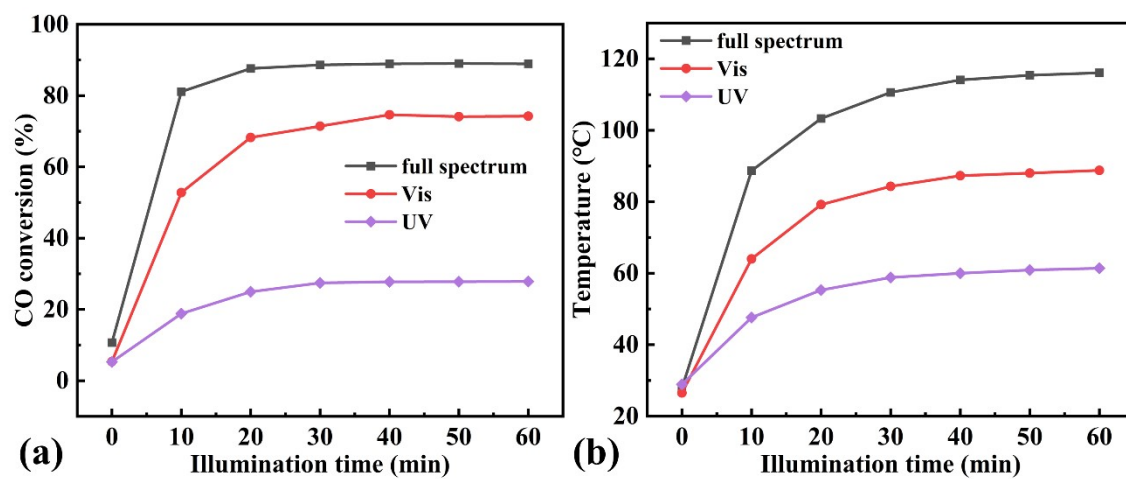

Figure S6. CO conversion and temperature curve of CuCoMnO<sub>x</sub>-300 in CO-PROX at 250mW/cm<sup>2</sup> illuminated under different optical composition.

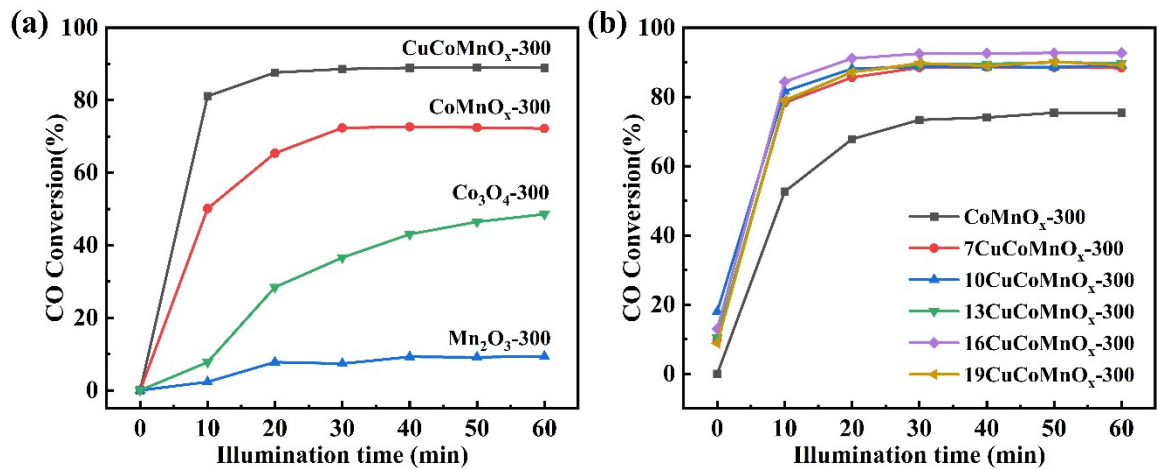

Figure S7. CO conversions of pure  $\text{Co}_3\text{O}_4$  and  $\text{Mn}_2\text{O}_3$ , binary  $\text{CoMnO}_x$  and ternary  $\text{CuCoMnO}_x$  calcined at  $300\text{ }^\circ\text{C}$  (a) and CO conversions of  $\text{CuCoMnO}_x$ -300 with different copper amount in photothermal CO-PROX at  $250\text{mW}/\text{cm}^2$ .

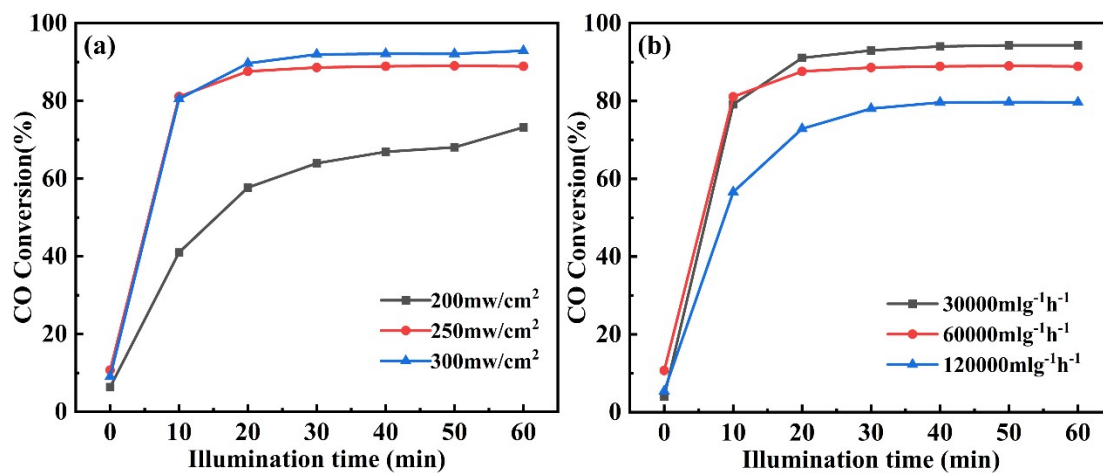

Figure S8. CO conversion of CuCoMnO<sub>x</sub>-300 in CO-PROX at different illumination power densities (a) and at different weight hourly space velocity (b) at 250 mW/cm<sup>2</sup> (b).



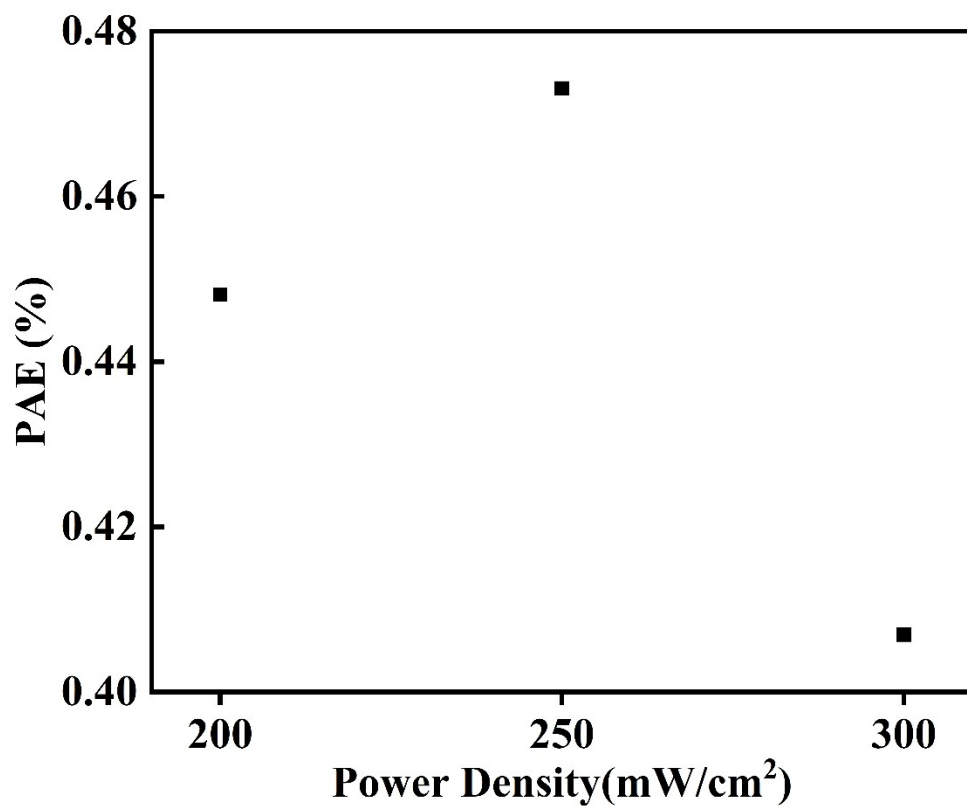

Figure S9. PAE values of CuCoMnO<sub>x</sub>-300 catalyst under different illumination densities.

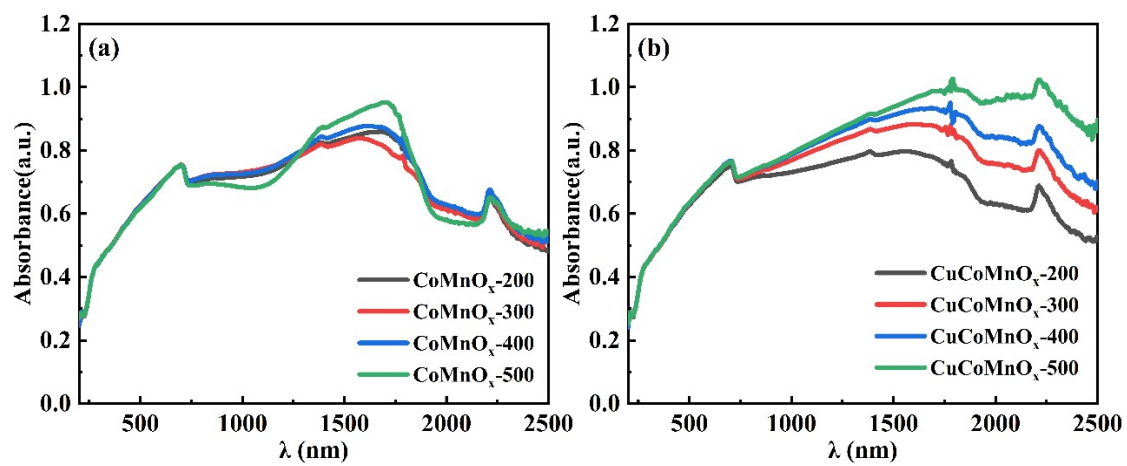

Figure S10. UV-Vis-IR absorption spectrums of (a)  $\text{CoMnO}_x$ -T, (b)  $\text{CuCoMnO}_x$ -T.

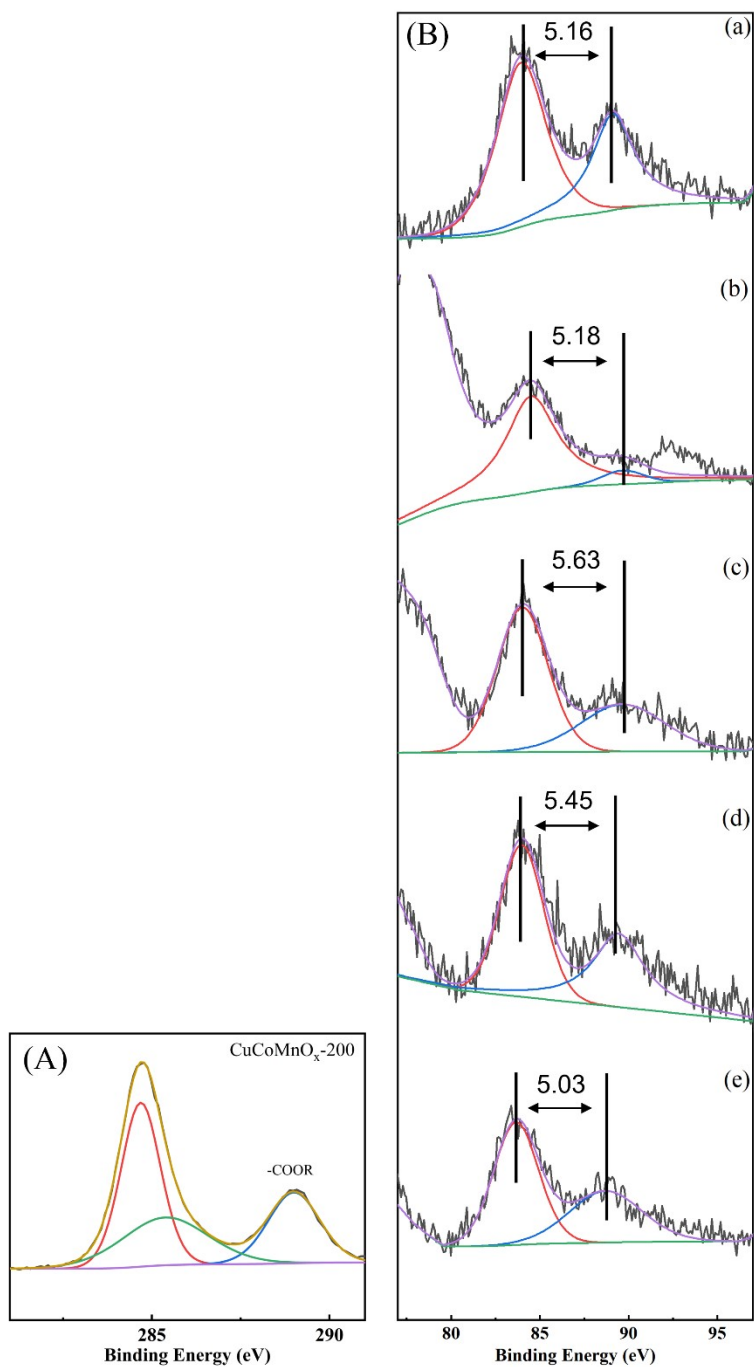

Figure S11. XPS spectra of C 1s (A) and Mn 3s (B) of CoMnO<sub>x</sub>-300 (a), CuCoMnO<sub>x</sub>-200 (b), CuCoMnO<sub>x</sub>-300 (c), CuCoMnO<sub>x</sub>-400 (d) and CuCoMnO<sub>x</sub>-500 (e).

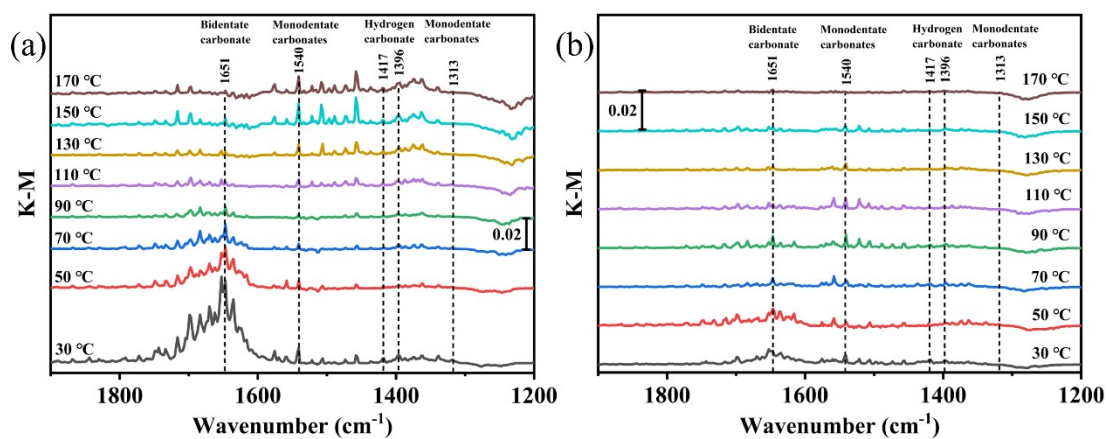

Figure S12. DRIFTS spectra (1900-1200 cm<sup>-1</sup>) of CoMnO<sub>x</sub>-300 (a) and CuCoMnO<sub>x</sub>-300 (b) under the reaction stream at different temperature.

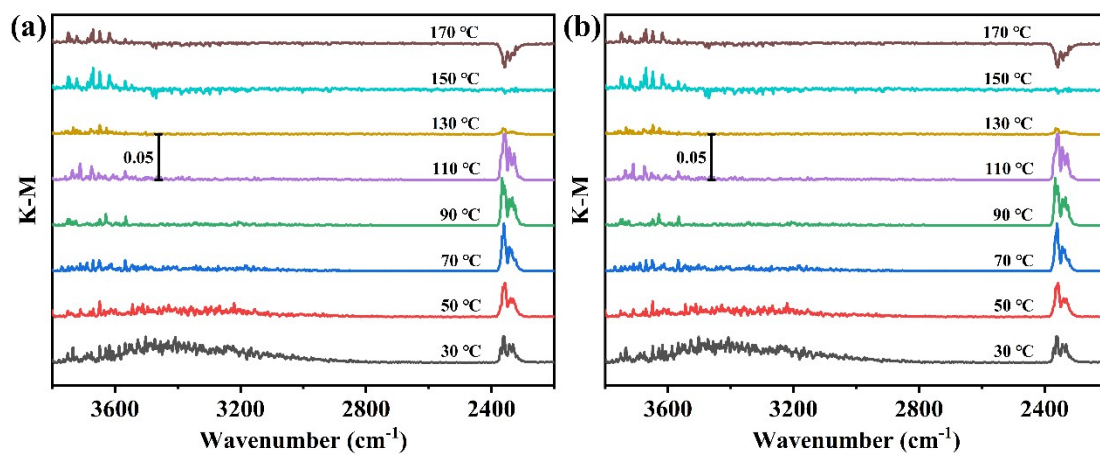

Figure S13. DRIFTS spectra (3800-2200  $\text{cm}^{-1}$ ) of  $\text{CoMnO}_x\text{-300}$  (a) and  $\text{CuCoMnO}_x\text{-300}$  (b).
